# Supplementary material
Source: PubMed Central journal article supplement (PMC5546222)
Supplement: NIHMS888338-supplement-10858_2017_123_MOESM1_ESM.pdf [file NIHMS888338-supplement-10858_2017_123_MOESM1_ESM.pdf]

## Supplementary Material

### **Sparse Isotopic Labeling for NMR Characterization of HtpG, the *E. coli* Hsp90**

Kari Pederson, Gordon R. Chalmers<sup>1</sup>, Qi Gao, Daniel Elnatan, Theresa A. Ramelot, Li-Chung Ma, Gaetano T. Montelione, Michael A. Kennedy, David A. Agard and James H. Prestegard

**Table S1.** RDC data and assignments for full-length HtpG at 37° C, pH 9.0

| peak   | Assignment | <sup>13</sup> C<br>(ppm) | <sup>1</sup> H<br>(ppm) | Peg<br>RDC | error | Phage<br>RDC | error |
|--------|------------|--------------------------|-------------------------|------------|-------|--------------|-------|
| X1C-H  | A537       | 23.6                     | 1.22                    | 3.7        | 2.2   | -1.9         | 2.6   |
| X2C-H  | A165       | 23.4                     | 1.39                    | 2.9        | 4.6   | 2.6          | 1.6   |
| X3C-H  | A403       | 23.0                     | 1.43                    | 4.5        | 3.1   | -2.3         | 4.8   |
| X4C-H  | A134       | 22.4                     | 0.94                    | -8.3       | 4.1   | -6.9         | 4.4   |
| X5C-H  | A143       | 20.2                     | 1.19                    | 0.2        | 2.3   | -6.0         | 2.1   |
| X6C-H  | A144       | 19.8                     | 1.35                    | 2.1        | 1.5   | 7.6          | 1.6   |
| X7C-H  | A232       | 19.7                     | 0.44                    | -25.1      | 1.8   | -18.3        | 1.5   |
| X8C-H  | A387       | 19.5                     | 0.64                    | 18.1       | 3.9   | 16.7         | 2.2   |
| X9C-H  | A439*      | 19.3                     | 1.54                    | -11.8      | 2.6   | -4.6         | 1.5   |
| X10C-H | A397       | 19.3                     | 1.71                    | -24.6      | 2.0   | -18.3        | 2.2   |
| X11C-H | A157       | 19.2                     | 1.64                    | -18.8      | 2.1   | -11.0        | 2.1   |
| X12C-H | A205       | 19.0                     | 1.38                    |            |       |              |       |
| X13C-H | A98        | 18.8                     | 1.36                    |            |       |              |       |
| X14C-H | A284*      | 18.8                     | 1.49                    | 40.7       | 2.8   |              |       |
| X15C-H | A557       | 18.7                     | 1.45                    | -2.6       | 0.9   |              |       |
| X16C-H | A42        | 18.7                     | 1.71                    | 3.9        | 3.4   | 4.1          | 2.5   |
| X17C-H | A368*      | 18.6                     | 1.29                    | -15.8      | 1.2   | -8.6         | 1.2   |
| X18C-H |            | 18.6                     | 1.38                    | -0.0       | 0.8   | 3.3          | 0.9   |
| X19C-H | A43        | 18.5                     | 1.60                    |            |       |              |       |
| X20C-H | A39*       | 18.4                     | 1.46                    | 1.4        | 1.1   | -0.9         | 0.4   |
| X21C-H | A556*      | 18.5                     | 1.43                    | 16.6       | 6.7   |              |       |
| X22C-H | A603       | 18.5                     | 1.59                    |            |       | 25.6         | 1.3   |
| X23C-H |            | 18.5                     | 1.53                    |            |       | 4.8          | 1.4   |
| X24C-H | A114       | 18.5                     | 1.45                    |            |       |              |       |
| X25C-H | A435*      | 18.4                     | 1.26                    | -16.4      | 1.1   |              |       |
| X26C-H | A50        | 18.4                     | 0.86                    | -2.9       | 1.5   | -2.3         | 1.5   |
| X27C-H |            | 18.3                     | 1.34                    | 0.6        | 2.0   | -0.8         | 0.7   |
| X28C-H | A543*      | 18.2                     | 1.39                    | 6.0        | 1.1   | -0.1         | 1.4   |
| X29C-H |            | 18.1                     | 1.46                    | -1.1       | 0.7   | 0.7          | 0.6   |
| X30C-H |            | 18.1                     | 1.71                    | 8.8        | 1.7   | 5.0          | 1.6   |
| X31C-H | A254*      | 18.0                     | 1.39                    | -22.3      | 2.3   | -15.1        | 1.2   |
| X32C-H |            | 17.9                     | 1.50                    | -3.9       | 1.4   | -2.9         | 0.9   |
| X33C-H |            | 17.8                     | 1.29                    | 28.7       | 4.2   | 15.6         | 2.3   |
| X34C-H | A517       | 17.8                     | 1.53                    | 2.9        | 1.5   | 6.2          | 1.8   |
| X35C-H | A130       | 17.6                     | 1.04                    | 32.8       | 2.0   | 16.4         | 1.9   |
| X36C-H | A580       | 17.3                     | 1.37                    | -3.3       | 2.8   | -2.2         | 2.5   |
| X37C-H | A580       | 17.1                     | 1.30                    | -6.7       | 2.9   | -2.0         | 2.2   |
| X38C-H | A581       | 16.9                     | 0.52                    | 0.3        | 2.9   | -0.2         | 4.8   |
| X39C-H | A581       | 16.8                     | 0.59                    | 4.2        | 3.1   | 3.8          | 2.4   |
| X40C-H | A411*      | 16.9                     | 1.14                    | 30.1       | 12.7  | 28.6         | 5.8   |

Assignments of moderate confidence, all others are high confidence

**Table S2.** Alanine chemical shifts for single domains of HtpG at 35 °C, pH 7.5

## N-terminal domain

| Residue Number | Residue Name | H    | N     | CO    | CA   | CB   | HB   | HA   |
|----------------|--------------|------|-------|-------|------|------|------|------|
| 39             | ALA          | 7.50 | 123.9 | 178.8 | 55.0 | 18.7 | 1.45 | 4.26 |
| 42             | ALA          | 8.18 | 122.7 | 181.5 | 54.9 | 18.9 | 1.74 | 4.20 |
| 43             | ALA          | 8.47 | 124.3 | 178.8 | 55.3 | 19.1 | 1.63 | 4.16 |
| 50             | ALA          | 8.75 | 120.1 | 178.8 | 52.5 | 18.4 | 0.86 | 4.06 |
| 98             | ALA          | 8.07 | 125.2 | 177.8 | 52.9 | 19.2 | 1.36 | 4.26 |
| 114            | ALA          | 8.16 | 123.5 | 178.5 | 53.3 | 18.9 | 1.43 | 4.26 |
| 130            | ALA          | 7.81 | 123.9 | 178.3 | 54.8 | 18.9 | 0.93 | 3.57 |
| 134            | ALA          | 7.68 | 124.9 | 175.1 | 51.1 | 23.0 | 0.95 | 5.11 |
| 143            | ALA          | 8.69 | 129.9 | 178.5 | 51.0 | 20.3 | 1.21 | 5.01 |
| 144            | ALA          | 8.71 | 123.9 | 177.9 | 52.5 | 19.9 | 1.37 | 4.09 |
| 157            | ALA          | 8.59 | 129.0 | 177.1 | 51.8 | 19.5 | 1.60 | 5.24 |
| 165            | ALA          | 9.40 | 126.3 | 174.6 | 51.4 | 23.8 | 1.38 | 4.79 |
| 205            | ALA          | 8.49 | 127.8 | 176.3 | 52.2 | 19.2 | 1.40 | 4.46 |

## Middle domain

| Residue Number | Residue Name | H | N | CO | CA | CB   | HB   | HA |
|----------------|--------------|---|---|----|----|------|------|----|
| 403            | ALA          |   |   |    |    | 23.1 | 1.44 |    |

## C-terminal domain

| Residue Number | Residue Name | H    | N     | CO    | CA   | CB   | HB   | HA   |
|----------------|--------------|------|-------|-------|------|------|------|------|
| 517            | ALA          | 8.05 | 120.6 | 179.4 | 54.5 | 18.0 | 1.52 | 4.14 |
| 537            | ALA          | 6.95 | 116.9 | 175.3 | 51.0 | 23.6 | 1.26 | 5.12 |
| 543            | ALA          | 8.28 | 124.9 | 177.8 | 53.3 | 19.1 | 1.39 | 4.24 |
| 551            | ALA          | 8.08 | 122.2 | 179.5 | 54.6 | 18.4 | 1.48 | 4.18 |
| 555            | ALA          | 8.02 | 123.0 | 179.3 | 53.7 | 18.7 | 1.46 | 4.30 |
| 556            | ALA          | 8.00 | 122.1 | 178.0 | 53.3 | 18.7 | 1.47 | 4.26 |
| 557            | ALA          | 7.84 | 120.8 | 178.2 | 52.5 | 18.9 | 1.46 | 4.37 |
| 580            | ALA          | 7.27 | 122.1 | 178.8 | 55.7 | 17.3 | 1.31 | 3.64 |
| 581            | ALA          | 8.20 | 117.8 | 179.2 | 54.8 | 17.3 | 0.68 | 3.93 |
| 587            | ALA          | 8.26 | 123.1 | 180.7 | 55.2 | 17.9 | 1.55 | 4.28 |
| 600            | ALA          | 7.73 | 122.3 | 181.0 | 54.7 | 18.0 | 1.55 | 4.26 |
| 603            | ALA          | 8.04 | 119.4 | 179.1 | 55.0 | 18.5 | 1.55 | 3.83 |
